# Supplementary material
Source: PubMed Central journal article supplement (PMC9622995)
Supplement: jcsm.10174.sm001.pdf [file jcsm.10174.sm001.pdf]

### Medium Threshold

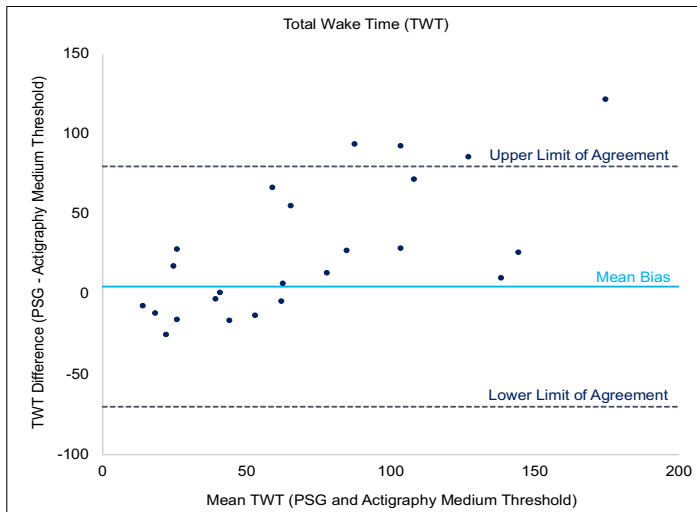

### High Threshold

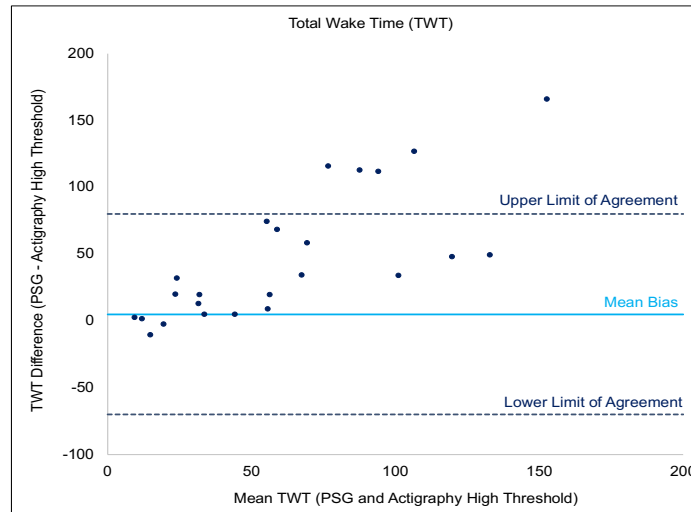

### Automatic Threshold

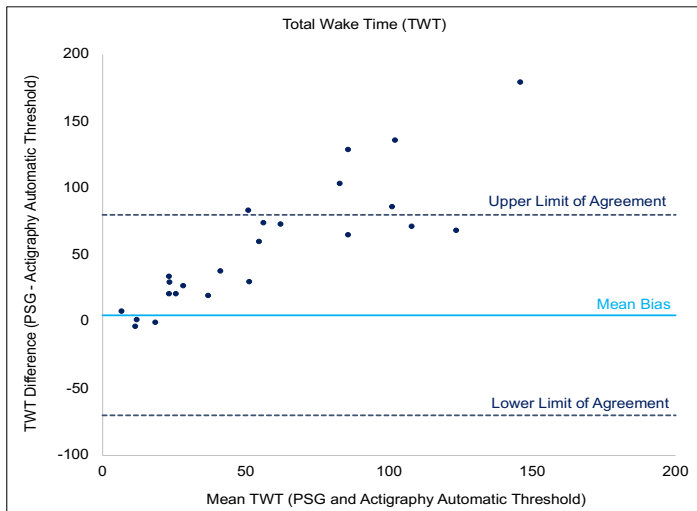

**Figure S1 Bland-Altman Plots of PSG and Actigraphy (Medium, High and Automatic) Measurement for Wake Time**

### Medium Threshold

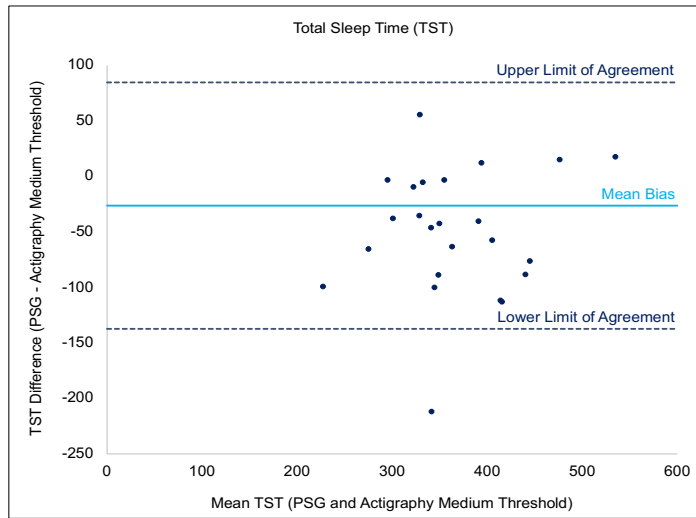

### High Threshold

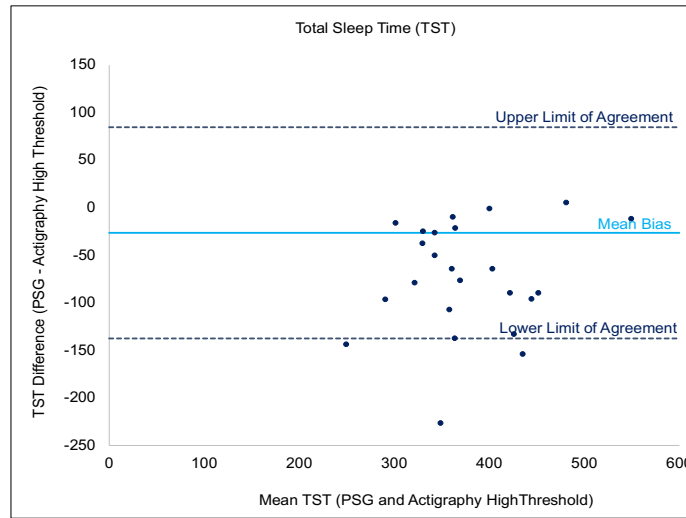

### Automatic Threshold

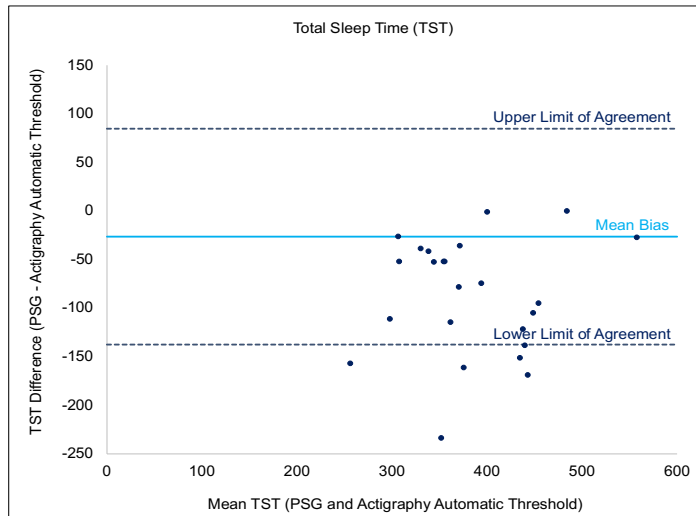

Figure S2 Bland-Altman Plots of PSG and Actigraphy (Medium, High and Automatic) Measurement for Sleep Time
